# Supplementary material
Source: Springer Nature journal article supplement (https://www.springermedizin.de/resource/supplementary/12986_2012_515_MOESM4_ESM.pdf/25654970)

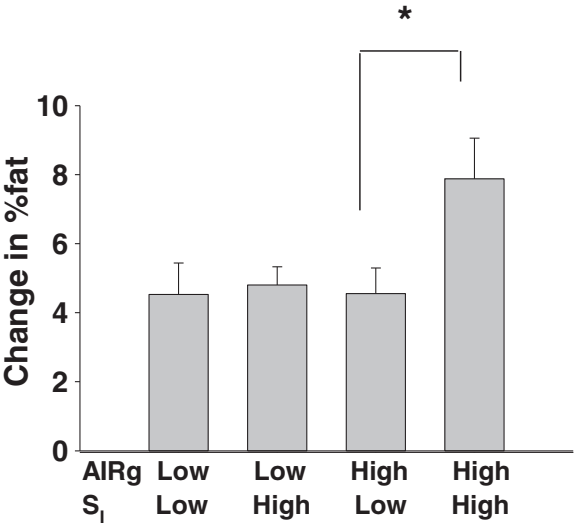

Supplement: MOESM4 [file 25654970]
